# Supplementary material for: The administration of exogenous HSP47 as a collagen-specific therapeutic approach
Source: JCI journal article supplement (doi:10.1172/jci.insight.181570), 2025-02-06

Row images figure 5c

Final image

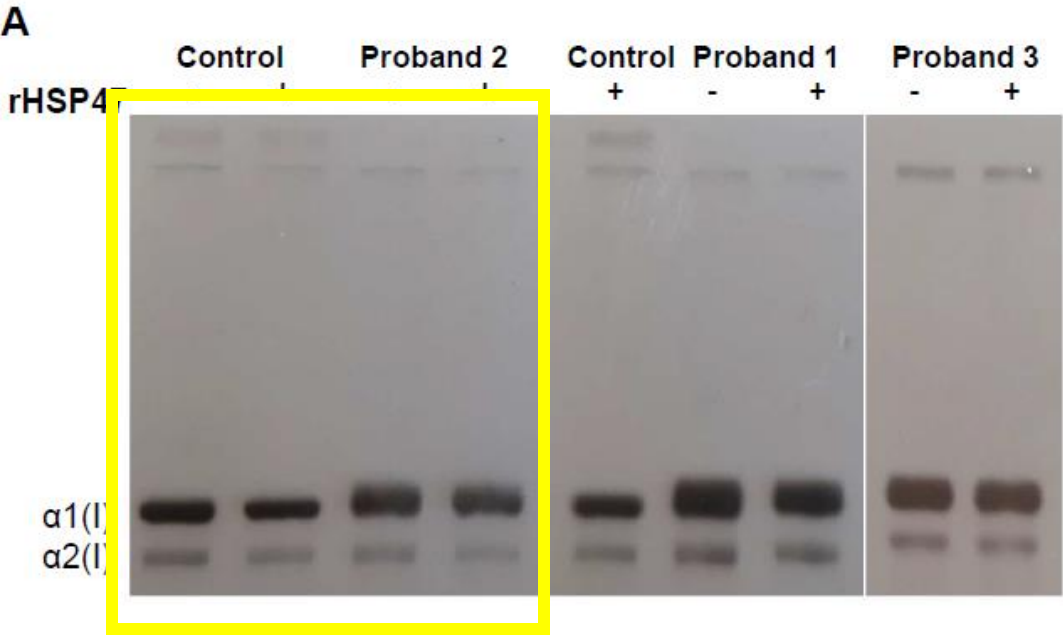

Row image

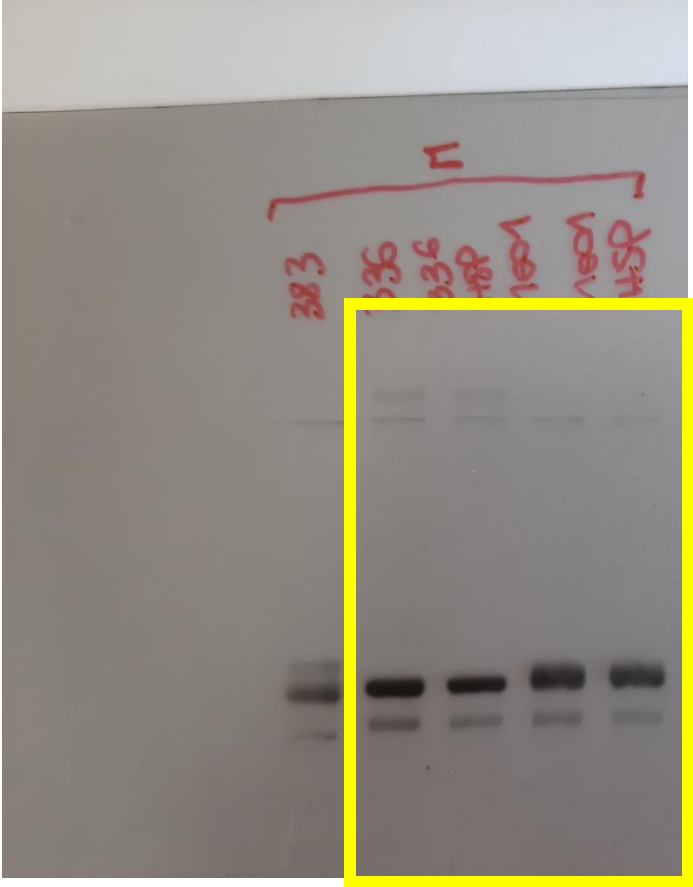

### Row image

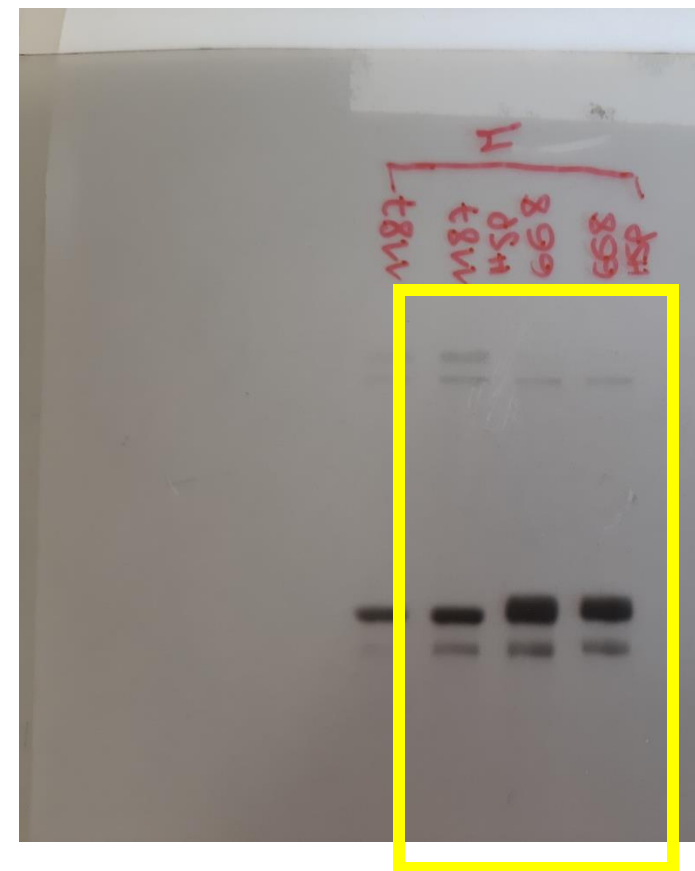

Final image

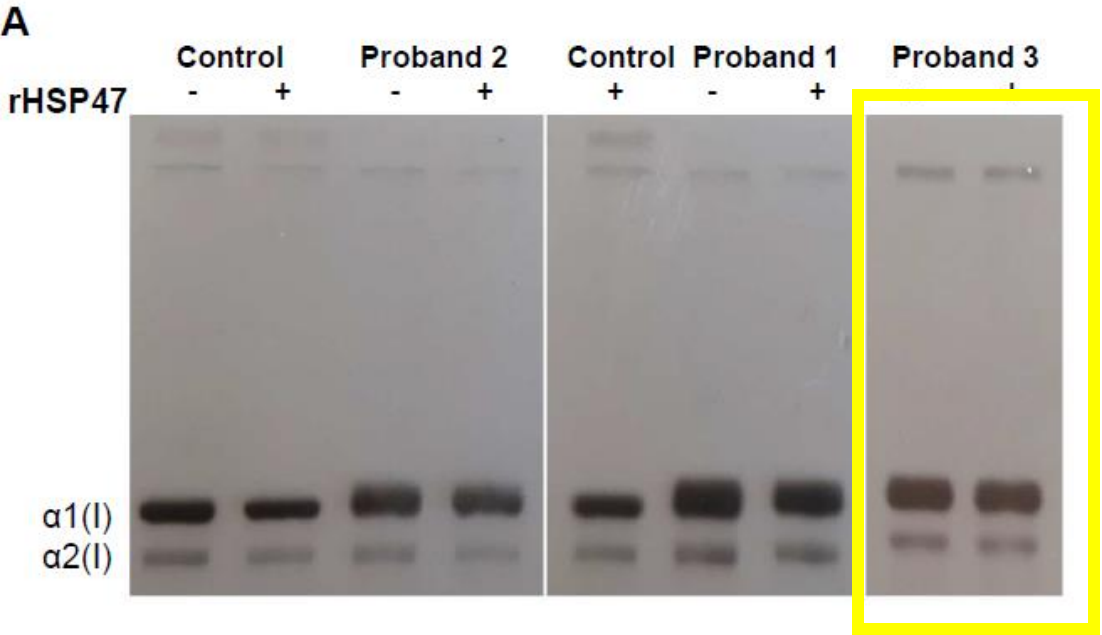

Row image

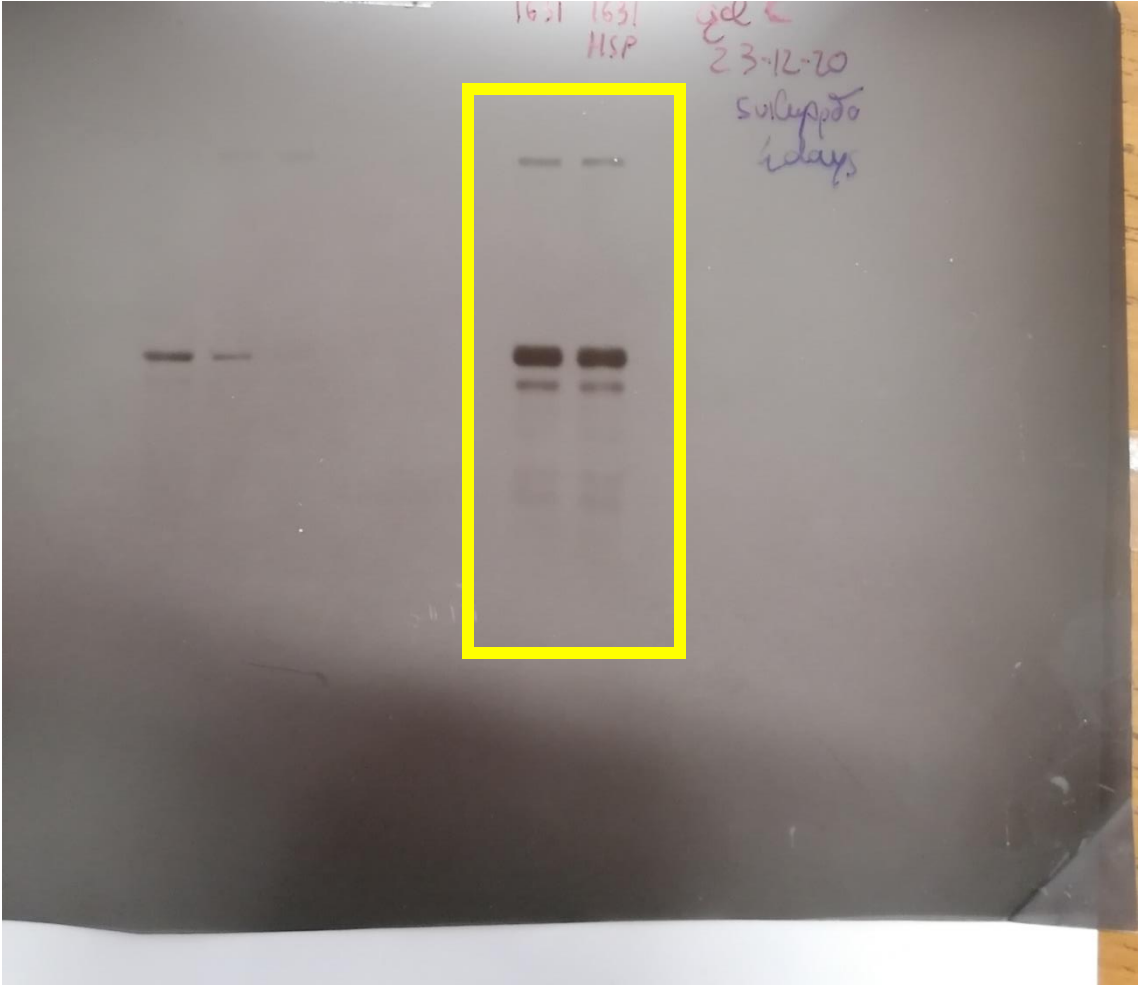

Supplement: sd1 [file 1]
